# Supplementary material
Source: publisher figshare collection journal article supplement (https://acs.figshare.com/ndownloader/files/20126882)
Supplement: Supplementary file 1 [file 20126882]

# **Printed Large-area Photovoltaic Modules based on Small-molecules with Different Alkyl Terminal Chains**

Youn-Jung Heo<sup>1</sup>, Bogyu Lim<sup>2,3,\*</sup>, Yen-Sook Jung<sup>1</sup>, Kyeongil Hwang<sup>1</sup>, Jueng-Eun Kim<sup>1</sup>,  
Donmin Lee<sup>1</sup>, Dae-Hee Lim<sup>1,4</sup>, Jong Mok Park<sup>3</sup>, and Dong-Yu Kim<sup>1,\*</sup>

<sup>1</sup>School of Material Science and Engineering, Research of Institute of Solar and Sustainable  
Energies, Gwangju Institute of Science and Technology, Gwangju 500-712, Republic of  
Korea

<sup>2</sup>Future Technology Research Center, Corporate R&D, LG Chem/LG Science Park, 30,  
Magokjungang 10-ro, Gangseo-gu, Seoul, 07796, Republic of Korea

<sup>3</sup>Green Fine Chemical Research Center, Advanced Convergent Chemistry Division,  
Korea Research Institute of Chemical Technology (KRICT), 45 Jongga-ro, Jung-  
gu, Ulsan, 44412, Republic of Korea

<sup>4</sup>Energy Materials Research Center, Korea Research Institute of Chemical Technology  
(KRICT), 141, Gajeong-re, Yuseong-gu, Daejeon, 34114, Republic of Korea

Corresponding Authors\*: E-mail: [bglim@krikt.re.kr](mailto:bglim@krikt.re.kr), [kimdy@gist.ac.kr](mailto:kimdy@gist.ac.kr)

**Table S1.** Photovoltaic parameter of slot-die coated solar cells with different amount of DIO additives

| Small molecule | Volume of additive (DIO) | V <sub>oc</sub> (V) | J <sub>sc</sub> (mA cm <sup>-2</sup> ) | FF   | PCE(%)     |
|----------------|--------------------------|---------------------|----------------------------------------|------|------------|
| LGC-D073       | 0%                       | 0.89                | 9.2                                    | 38.3 | 3.13(2.96) |
|                | 3%                       | 0.84                | 9.7                                    | 59.6 | 4.93(4.48) |
|                | 6%                       | 0.85                | 9.8                                    | 61.9 | 5.17(5.08) |
|                | 9%                       | 0.84                | 11.3                                   | 62   | 5.82(5.56) |
|                | 12%                      | 0.81                | 9.64                                   | 62   | 4.84(4.70) |
| LGC-D023       | 0%                       | 0.86                | 6.61                                   | 51.7 | 2.95(2.72) |
|                | 3%                       | 0.85                | 9.49                                   | 65.7 | 5.33(5.10) |
|                | 6%                       | 0.85                | 8.27                                   | 58.9 | 4.13(3.95) |
|                | 9%                       | 0.86                | 7.74                                   | 58.4 | 3.93(3.60) |
|                | 12%                      | 0.88                | 4.74                                   | 52.3 | 2.17(2.05) |

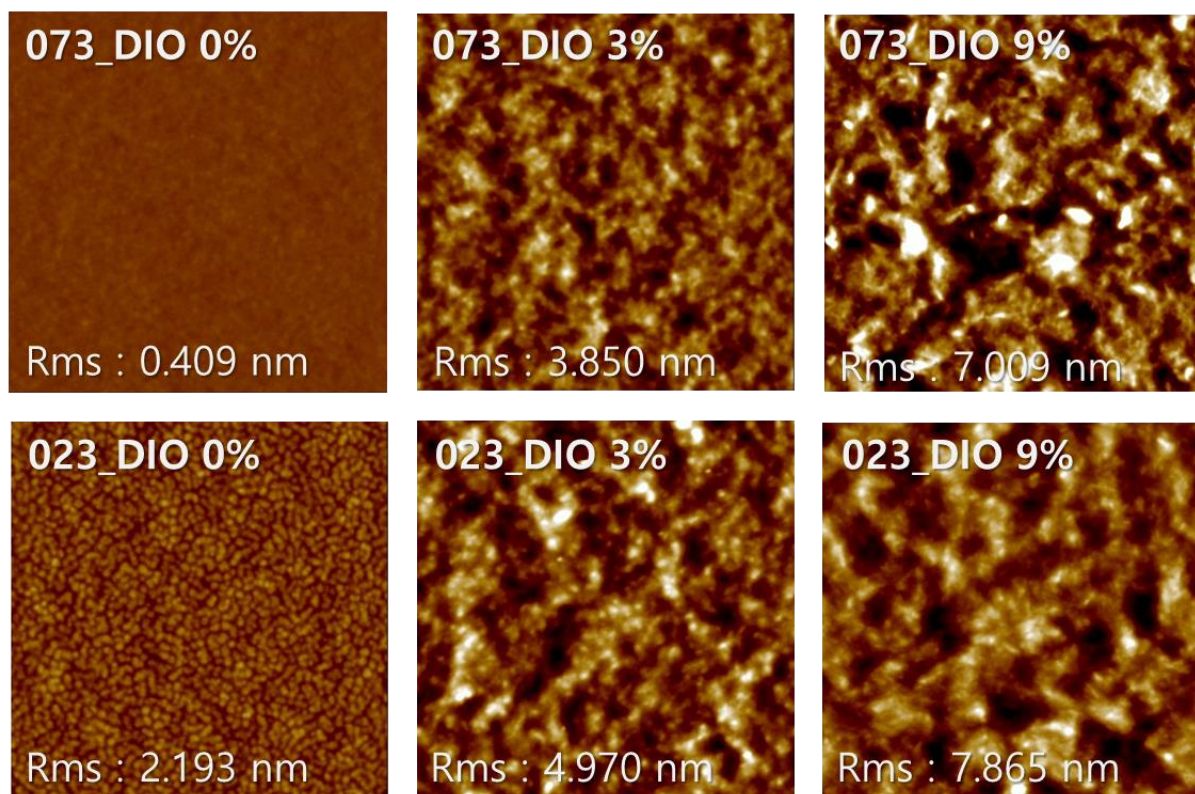

**Figure S1.** AFM images of slot-die coated thin films.

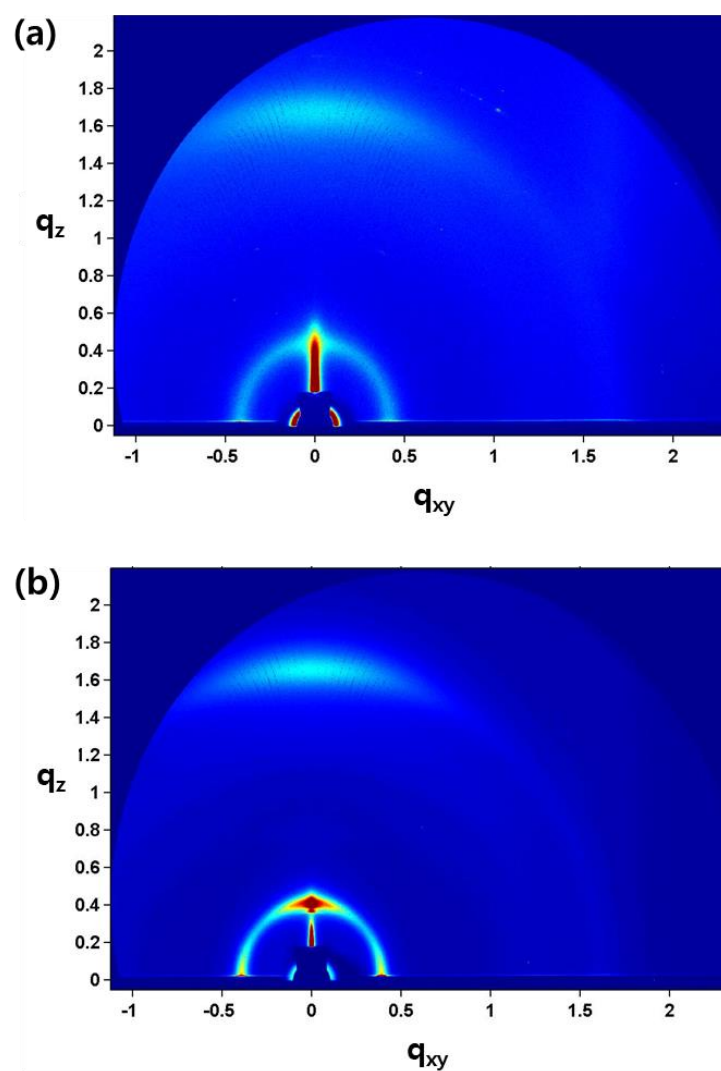

**Figure S2.** 2D GIXD patterns for pure films of (a) LGC-073 and (b) LGC-023 small molecules.

**Table S2.** Crystallographic information of slot-die coated thin films based on the small molecules

|          |        |                            | Out of plane<br>(100) | In plane<br>(100)      (010) |      |
|----------|--------|----------------------------|-----------------------|------------------------------|------|
| LGC-D073 | DIO 0% | Q ( $\text{\AA}^{-1}$ )    | -                     | 0.51                         | -    |
|          |        | D-spacing ( $\text{\AA}$ ) | -                     | 12.31                        | -    |
|          | DIO 3% | Q ( $\text{\AA}^{-1}$ )    | 0.44                  | 0.41                         | 1.66 |
|          |        | D-spacing ( $\text{\AA}$ ) | 14.27                 | 15.32                        | 3.78 |
|          | DIO 9% | Q ( $\text{\AA}^{-1}$ )    | 0.42                  | 0.40                         | 1.60 |
|          |        | D-spacing ( $\text{\AA}$ ) | 14.95                 | 15.70                        | 3.92 |
| LGC-D023 | DIO 0% | Q ( $\text{\AA}^{-1}$ )    | 0.39                  | 0.39                         | 1.64 |
|          |        | D-spacing ( $\text{\AA}$ ) | 16.11                 | 16.11                        | 3.83 |
|          | DIO 3% | Q ( $\text{\AA}^{-1}$ )    | 0.38                  | 0.36                         | 1.60 |
|          |        | D-spacing ( $\text{\AA}$ ) | 16.53                 | 17.45                        | 3.92 |
|          | DIO 9% | Q ( $\text{\AA}^{-1}$ )    | 0.37                  | 0.36                         | 1.60 |
|          |        | D-spacing ( $\text{\AA}$ ) | 16.98                 | 17.45                        | 3.92 |

(a)

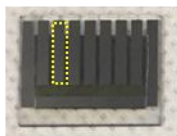

**Active area =  $0.1 \text{ cm}^2$**

(b)

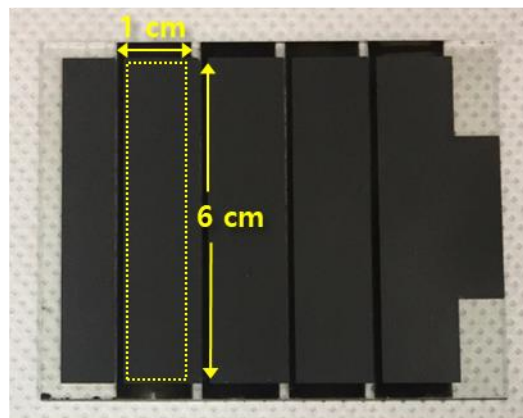

**Active area =  $24 \text{ cm}^2$**   
**( $6 \text{ cm}^2 \times 4 \text{ stripes}$ )**

**Figure S3.** Photographic of (a) small-area single-cell and (b) large-area photovoltaic modules. The geometrical FF of large-area photovoltaic modules is calculated to be 50%. (The geometrical FF is percentage of the active area of  $24 \text{ cm}^2$  divided by substrate area of  $48 \text{ cm}^2$ .)

**Table S3.** Photovoltaic parameters of slot-die printed large-area modules

| Photovoltaic modules | V <sub>oc</sub> (V) | J <sub>sc</sub> (mA cm <sup>-2</sup> ) | FF        | PCE(%)     |
|----------------------|---------------------|----------------------------------------|-----------|------------|
| LGC-D073             | 3.30(3.11)          | 3.10(2.72)                             | 54(48.50) | 5.50(4.17) |
| LGC-D023             | 3.47(3.33)          | 2.28(2.10)                             | 57(55.06) | 4.53(3.90) |



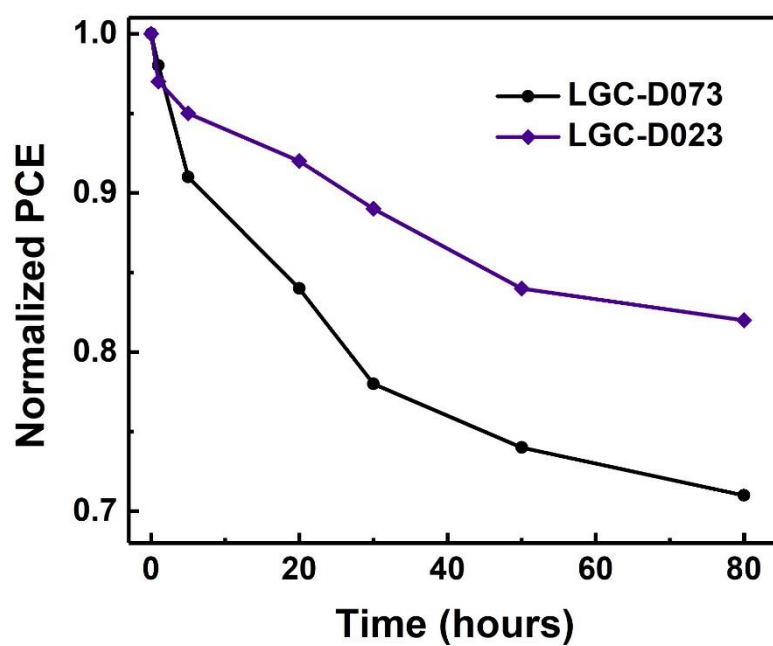

**Figure S4.** Normalized power conversion efficiency of slot-die coated devices as a function of storage time in N<sub>2</sub> atmosphere. The relative lower stability of LGC-D073 will be attributed to the higher volume of DIO additive.

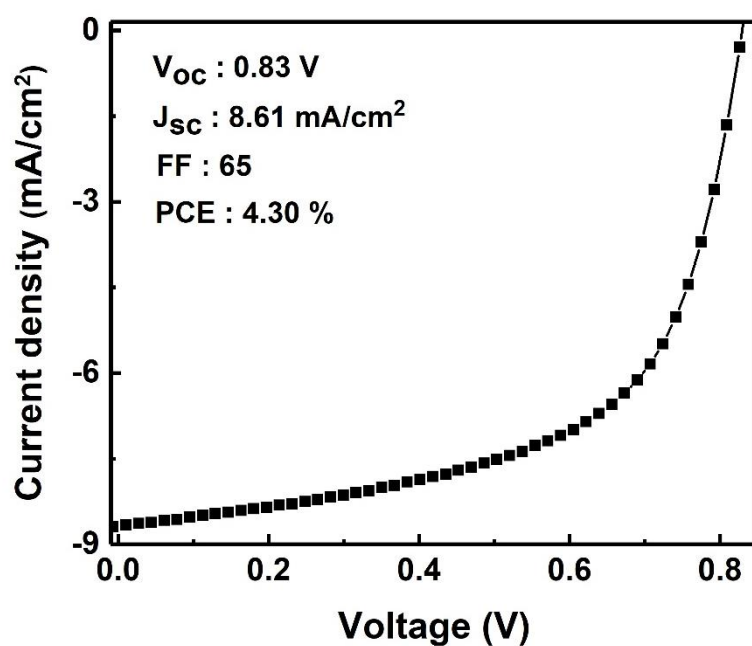

**Figure S5.** The J-V curves of slot-die coated devices processed from non-halogenated solvent, xylene. Due to the better solubility of LGC-D023, we just tried to fabricate the solar cells by using the only LGC-D023. The quite low efficiency of slot-die coated solar cells will be attributed to the relatively poor solubility for xylene compared to the chlorobenzene.
